# Supplementary material for: Enhanced water splitting kinetics using MgFeO3/MXene/VS2 hybrid bifunctional catalysts
Source: Royal Society of Chemistry journal article supplement (doi:10.1039/d4ta05656f), 2024-01-01
Supplement: d4ta05656f1.pdf [file d4ta05656f1.pdf]

## Supporting Information

### Enhanced water splitting kinetics using $\text{MgFeO}_3/\text{MXene}/\text{VS}_2$ hybrid bifunctional catalysts

Sajjad Hussain<sup>a,b</sup>, Dhanasekaran Vikraman<sup>c</sup>, Zulfqar Ali Sheikh<sup>d</sup>, Sikandar Aftab<sup>e</sup>, Ghazanfar Nazir<sup>b</sup>, Shoyebmohamad F. Shaikh<sup>f</sup>, Deok-Kee Kim<sup>d</sup>, Hyun-Seok Kim<sup>c,\*</sup>, Jongwan Jung<sup>a,b,\*</sup>

<sup>a</sup> Hybrid Materials Center (HMC), Sejong University, Seoul 05006, Republic of Korea.

<sup>b</sup> Department of Nanotechnology and Advanced Materials Engineering, Sejong University, Seoul 05006, Republic of Korea.

<sup>c</sup> Division of Electronics and Electrical Engineering, Dongguk University-Seoul, Seoul 04620, Republic of Korea.

<sup>d</sup> Department of Convergence Engineering for Intelligent Drone and Department of Electrical Engineering, Sejong University, Seoul 05006, Republic of Korea.

<sup>e</sup> Department of Intelligent Mechatronics Engineering, Sejong University, Seoul 05006, Republic of Korea

<sup>f</sup> Department of Chemistry, College of Science, King Saud University, P.O. Box 2455, Riyadh 11451, Saudi Arabia

\*Corresponding authors' Email: [hyunseokk@dongguk.edu](mailto:hyunseokk@dongguk.edu) (H.S.K); [jwjung@sejong.ac.kr](mailto:jwjung@sejong.ac.kr) (J.J)

## S1. Electrode preparation

All electrocatalytic experiments were conducted with a PARSTAT MC (PMC-200) workstation at a sweep rate of 10 mV/s, utilizing a standard three-electrode setup in 1 M KOH electrolyte for the HER, OER and overall water splitting tests at room temperature. Working electrodes were prepared by homogenizing active materials (MFO, MFO/MXene, MFO/VS<sub>2</sub>, and MFO/MXene/VS<sub>2</sub>) with poly(vinylidene fluoride) and carbon black in an 80:10:10 ratio, respectively, using N-methyl-2-pyrrolidone as the solvent. This slurry was coated onto nickel foam (NF) substrates and thermally treated at 100 °C for 12 hours to remove contaminants and solvent, achieving a consistent loading of 3 mg of active material. In the HER and OER experiments, the active materials functioned as the working electrodes, with a Hg/HgO electrode as the reference and a graphite rod as the counter electrode in an alkaline medium. Electrochemical impedance spectroscopy (EIS) was performed over a frequency range of 10 mHz to 100 kHz with a 10 mV potential amplitude. Water-splitting reactions were evaluated in device configurations of MFO/MXene/VS<sub>2</sub>||MFO/MXene/VS<sub>2</sub> and Pt/C||RuO<sub>2</sub>, with EIS conducted in a 1 M KOH solution. iR correction for ohmic resistance losses was applied during polarization studies, and electrode potentials were referenced to the reversible hydrogen electrode (RHE) using the equation:

$$E(\text{RHE})_{\text{HgO}} = E(\text{vs. Hg/HgO}) + E^0_{(\text{Hg/HgO})} + 0.0592 \times \text{pH}.$$

## S2. Characterization Techniques

XRD patterns were obtained using a Rigaku X-ray diffractometer with Cu-K $\alpha$  radiation (0.154 nm) at 40 kV and 40 mA, scanning from 5-80° (2 $\theta$ ). The morphological properties and elemental mapping/analysis of the prepared nanostructures were characterized using field-emission scanning electron microscopy (HITACHI S-4700) and transmission electron microscopy

(JEOL JEM-2100F, 200 kV). Raman spectroscopy measurements were conducted at room temperature with a Renishaw Invia RE04, employing a 512 nm Ar laser with a 30-second exposure time. XPS measurements were performed using an Ulvac PHI X-tool spectrometer with Al K $\alpha$  X-ray radiation (1486.6 eV).

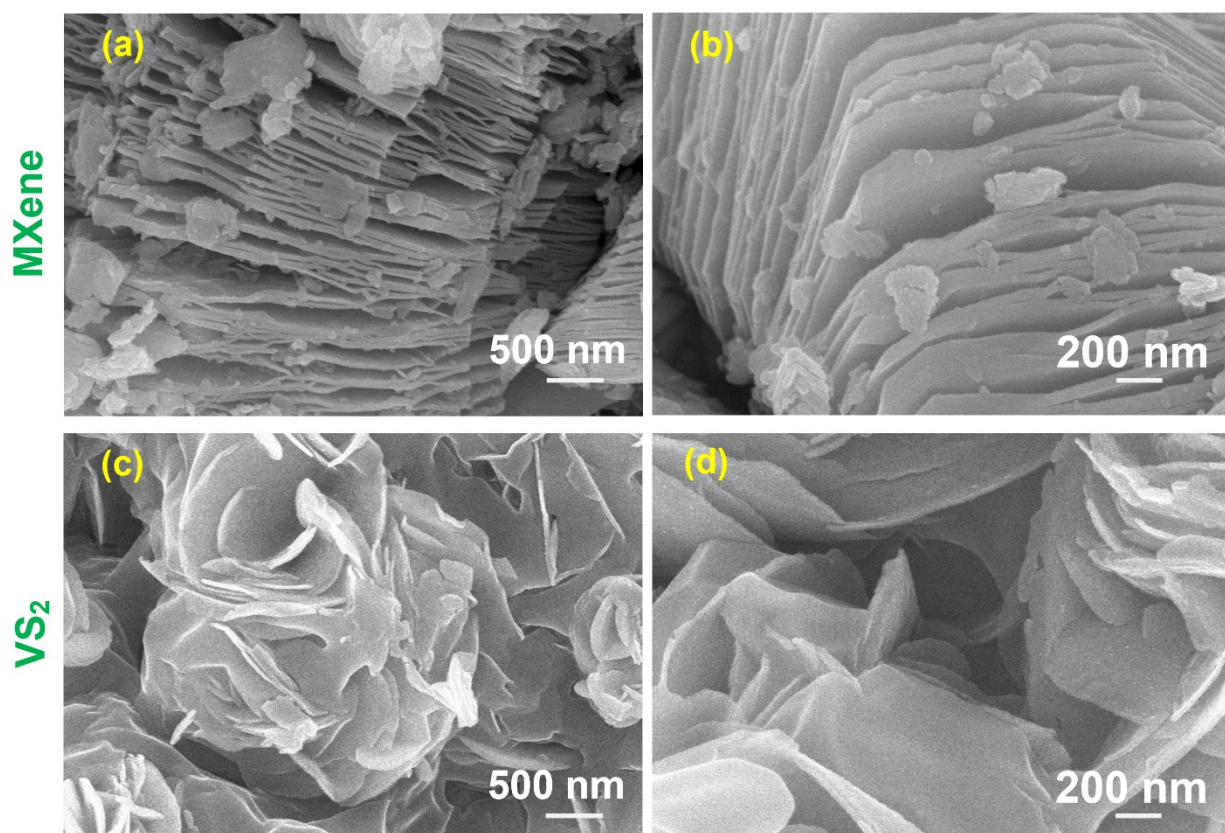

**Figure S1.** Field emission scanning electron microscopy (FESEM) images showing the morphological characteristics of (a-b) MXene and (c-d) VS<sub>2</sub>.

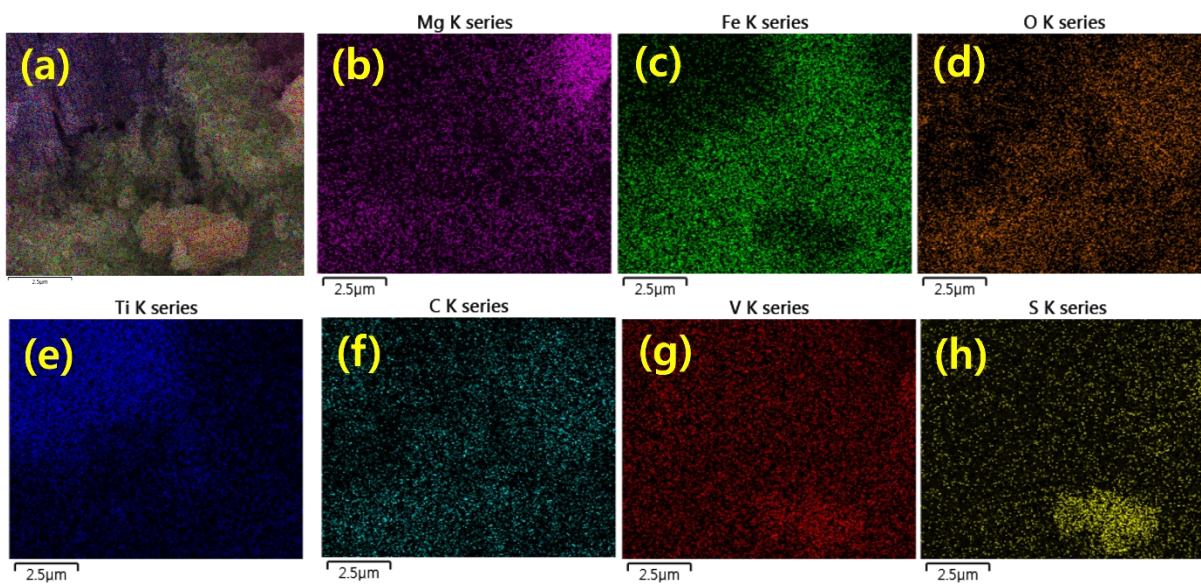

**Figure S2.** (a) FESEM mapping image of MFO/MXene/VS<sub>2</sub> hybrid composite and (b-h) their elemental mapping images ((b) Mg; (c) Fe; (d) O; (e) Ti; (f) C; (g) V and (g) S).

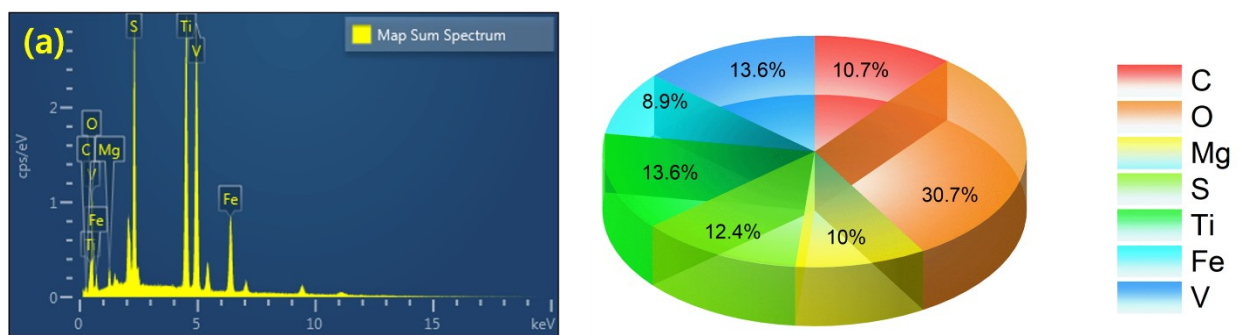

**Figure S3.** (a) Energy dispersive X-ray spectroscopy (EDS) pattern and (b) the composition of MFO/MXene/VS<sub>2</sub> hybrid.

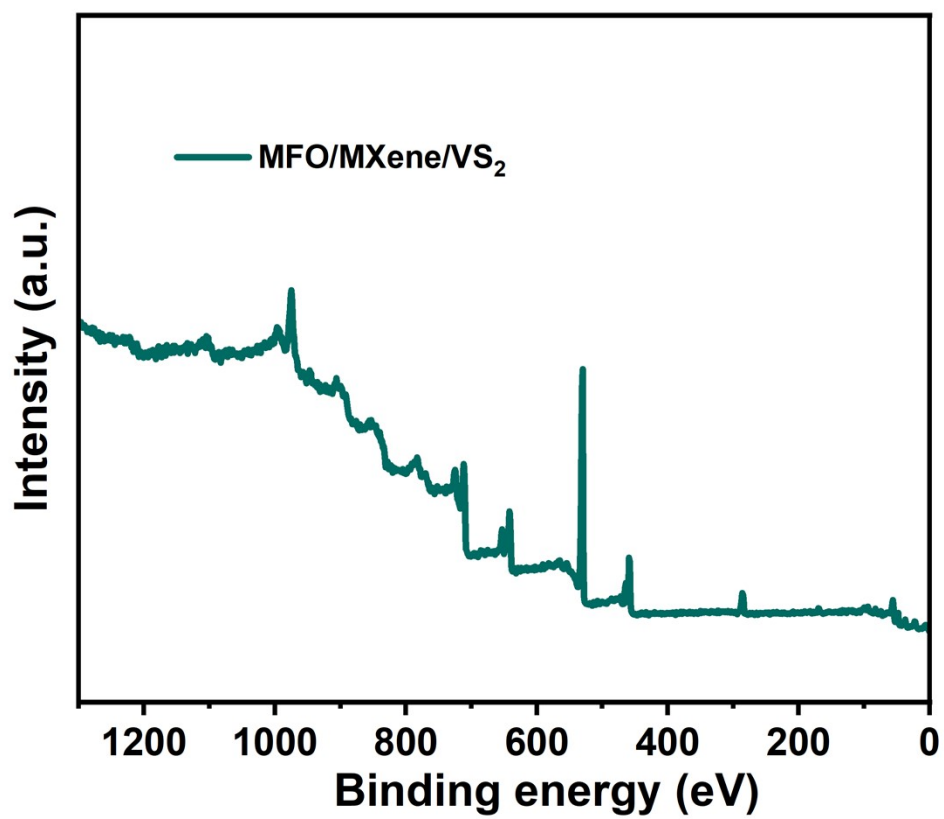

**Figure S4.** X-ray photoelectron spectroscopy (XPS) survey profile of the MFO/MXene/VS<sub>2</sub> hybrid

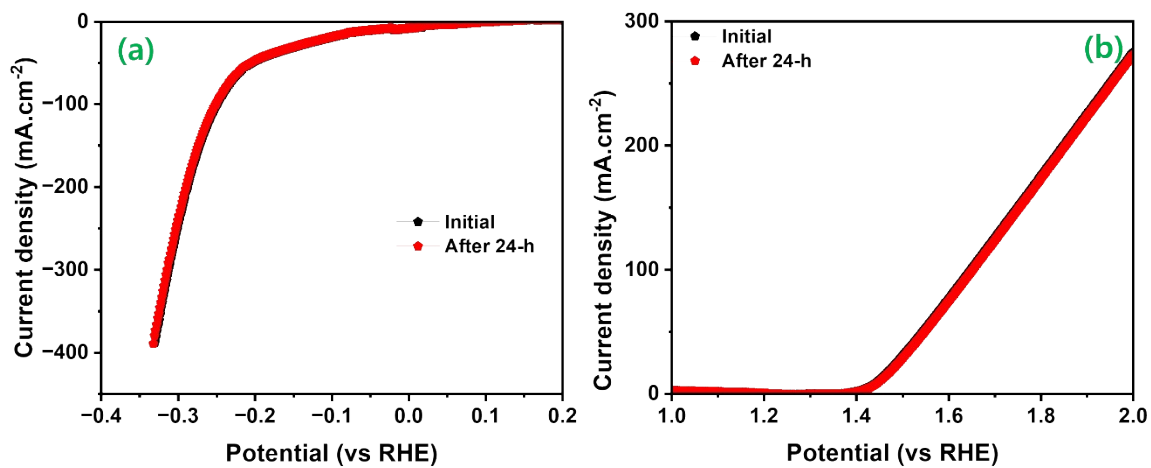

**Figure S5.** Linear sweep voltammetry (LSV) curves of MFO/MXene/VS<sub>2</sub> hybrid composite before and after 24-h working operation in 1 M KOH electrolyte solution.



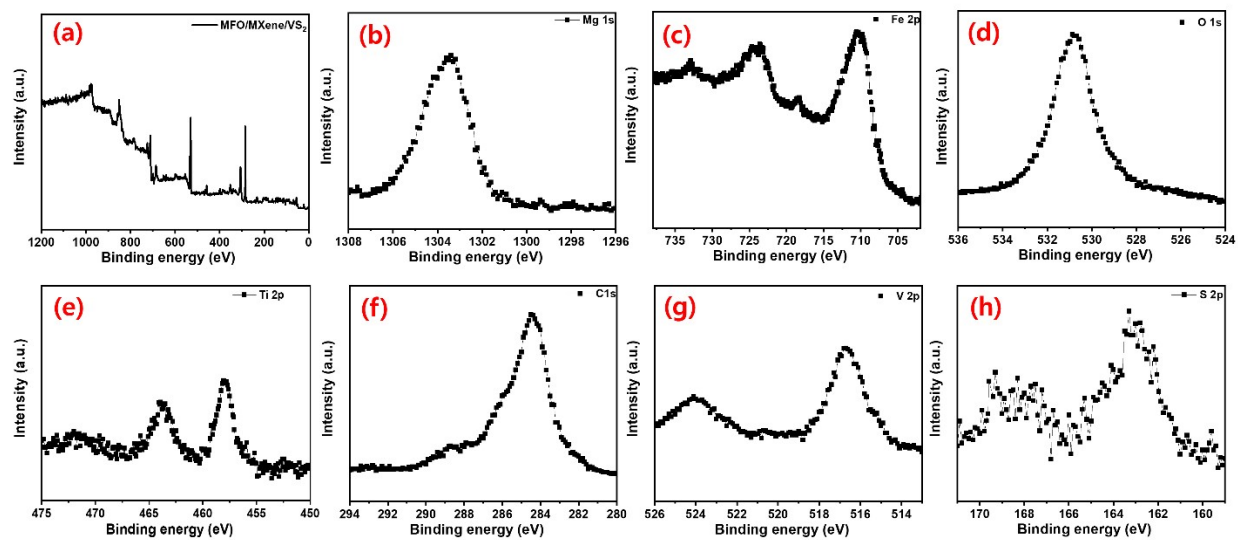

**Figure S6.** High-resolution X-ray photoelectron spectroscopy (XPS) profiles after 24-h overall water splitting process: (a) survey scan, (b) Mg 1s, (c) Fe 2p, (d) O 1s, (e) Ti 2p, (f) C 1s, (g) V 2p, and (h) S 2p regions of MFO/MXene/VS<sub>2</sub> hybrid composites.

**Table S1.** HER catalytic performances of the TMDs and MXene-based electrocatalysts

| Electrocatalyst                                                         | Electrolyte                                        | $\eta$ (mV)                       | Synthesis Method            | Morphology                                            | Tafel Slope (mV·dec <sup>-1</sup> ) | Ref              |
|-------------------------------------------------------------------------|----------------------------------------------------|-----------------------------------|-----------------------------|-------------------------------------------------------|-------------------------------------|------------------|
| <i>MgFeO<sub>3</sub>@MXene@VS<sub>2</sub></i>                           | 1M KOH                                             | 34 @ 10 mA/cm <sup>2</sup>        | Hydrothermal synthesis      | <i>Nano-cubes integrated hybrid nanosheets</i>        | 62                                  | <i>This work</i> |
| FeNi@MXene (Mo <sub>2</sub> TiC <sub>2</sub> T <sub>x</sub> )           | 1M KOH                                             | 160@ 10 mA/cm <sup>2</sup>        | Solvothermal reaction       | FeS <sub>2</sub> nanoparticles anchored on nanosheets | 103.46                              | 1                |
| MoS <sub>2</sub> @Mo <sub>2</sub> CTx                                   | 0.5M H <sub>2</sub> SO <sub>4</sub>                | 176@10 mA/cm <sup>2</sup>         | Etching + Hydrothermal      | 2D organ                                              | 207                                 | 2                |
| Co-MoS <sub>2</sub> @Mo <sub>2</sub> CTx                                | 1M KOH                                             | 112@10 mA/cm <sup>2</sup>         | Etching + Tube furnace      | bulk morphology                                       | 82                                  | 3                |
| NiFe-LDH/MXene-RGO                                                      | 1M KOH                                             | 362@10 mA/cm <sup>2</sup>         | Etching + Hydrothermal      | 3D porous skeletons                                   | 100                                 | 4                |
| WS <sub>2</sub> /W <sub>2</sub> C heterostructure                       | 0.5 M H <sub>2</sub> SO <sub>4</sub>               | 126@ 10 mA/cm <sup>2</sup>        | CVD                         | Nano-sheet                                            | 68                                  | 5                |
| MoS <sub>2</sub> /Ti <sub>3</sub> C <sub>2</sub> -MXene@C               | 0.5 M H <sub>2</sub> SO <sub>4</sub>               | 135@ 10 mA/cm <sup>2</sup>        | Etching + Tube furnace      | Flower+ 3D porous                                     | 45                                  | 6                |
| WS <sub>2</sub> /Ti <sub>3</sub> C <sub>2</sub>                         | 0.5 M H <sub>2</sub> SO <sub>4</sub>               | 150@ 10 mA/cm <sup>2</sup>        | Etching + Hydrothermal      | accordion-multilayer+ nanosheets                      | 62                                  | 7                |
| MoS <sub>2</sub> /MXene heterostructures                                | 0.5 M H <sub>2</sub> SO <sub>4</sub>               | 280@ 10 mA/cm <sup>2</sup>        | Etching + Hydrothermal      | accordion-multilayer+ coarse and uneven               | 68                                  | 8                |
| MoO <sub>2</sub> /α-Mo <sub>2</sub> C heterojunction                    | 0.5 M H <sub>2</sub> SO <sub>4</sub> and 1.0 M KOH | 152 & -100@ 10 mA/cm <sup>2</sup> | CVD                         | core-shell structure                                  | 65 & 50                             | 9                |
| Ti <sub>2</sub> NT <sub>x</sub> @MOF-CoP                                | 1M KOH                                             | 112@10 mA/cm <sup>2</sup>         | freeze-drying+ tube furnace | cubic-like layered ultrathin                          | 67.1                                | 10               |
| NiSe <sub>2</sub> /Ti <sub>3</sub> C <sub>2</sub> T <sub>x</sub> hybrid | 0.5 M H <sub>2</sub> SO <sub>4</sub>               | 200 mV @10 mA g <sup>-1</sup>     | Etching + Hydrothermal      | Octahedral structure                                  | 37.7                                | 11               |
| MoS <sub>2</sub> /Mo <sub>2</sub> C-NCNTs                               | 0.5 M H <sub>2</sub> SO <sub>4</sub>               | 145@ 10 mA/cm <sup>2</sup>        | Etching + Hydrothermal      | Hierarchical 1D nanostructure                         | 69                                  | 12               |
| WS <sub>2</sub> -Ti <sub>3</sub> C <sub>2</sub> T <sub>x</sub>          | 0.5 M H <sub>2</sub> SO <sub>4</sub>               | 66@ 10 mA/cm <sup>2</sup>         | Etching + Hydrothermal      | wrinkled nanosheets                                   | 46.7                                | 13               |
| Mo <sub>2</sub> C Nanoparticles/ Graphitic CC                           | 0.5 M H <sub>2</sub> SO <sub>4</sub>               | 200@ 10 mA/cm <sup>2</sup>        | CVD                         | Nanoparticles porous nanofibers                       | 62.6                                | 14               |
| MoP/Mo <sub>2</sub> C@C                                                 | 0.5 M H <sub>2</sub> SO <sub>4</sub>               | 89@ 10 mA/cm <sup>2</sup>         | Tube furnace                | Nanoparticles                                         | 45                                  | 15               |
| V-Ti <sub>4</sub> N <sub>3</sub> T <sub>x</sub>                         | 0.5 M H <sub>2</sub> SO <sub>4</sub>               | 330 @ 10 mA/cm <sup>2</sup>       | oxygen-assisted molten salt | multilayer flakes                                     | 190                                 | 16               |
| BNNS@Ti <sub>3</sub> C <sub>2</sub>                                     | 0.5M H <sub>2</sub> SO <sub>4</sub>                | 52@10 mA/cm <sup>2</sup>          | ball-milling+ tube furnace  | multilayer broken flakes                              | 39                                  | 17               |
| Ni/β-Mo <sub>2</sub> C                                                  | 0.5 M H <sub>2</sub> SO <sub>4</sub>               | 155 @ 10 mA/cm <sup>2</sup>       | tube furnace                | irregular shaped                                      | 79                                  | 18               |

**Table S2.** OER catalytic performances of the TMDs and MXene-based electrocatalysts

| Electrocatalyst                                                               | Electrolyte   | $\eta$ (mV)                       | Synthesis Method                | Morphology                                            | Tafel Slope (mV $\cdot$ dec $^{-1}$ ) | Ref              |
|-------------------------------------------------------------------------------|---------------|-----------------------------------|---------------------------------|-------------------------------------------------------|---------------------------------------|------------------|
| <i>CoNiO<sub>2</sub>@MoS<sub>2</sub></i>                                      | <i>1M KOH</i> | <i>220 @ 10 mA/cm<sup>2</sup></i> | <i>Hydrothermal synthesis</i>   | <i>Nano-cubes integrated hybrid nanosheets</i>        | <i>44</i>                             | <i>This work</i> |
| FeNi@MXene (Mo <sub>2</sub> TiC <sub>2</sub> T <sub>x</sub> )                 | 1M KOH        | 190@ 10 mA/cm <sup>2</sup>        | Solvothermal reaction           | FeS <sub>2</sub> nanoparticles anchored on nanosheets | 42.78                                 | 1                |
| Ti <sub>2</sub> NT <sub>x</sub> @MOF-CoP                                      | 1M KOH        | 241@50 mA/cm                      | freeze-drying+ tube furnace     | cubic-like layered ultrathin                          | 96.7                                  | 10               |
| FeNi-LDH/Ti <sub>3</sub> C <sub>2</sub> -MXene                                | 1M KOH        | 250 @ 10 mA/cm <sup>2</sup>       | Etching + freeze-drying         | 3D porous network                                     | 42                                    | 19               |
| CoP/Mo <sub>2</sub> CT <sub>x</sub>                                           | 1M KOH        | 260@10 mA/cm                      | Etching + tube furnace          | accordion-multilayer+ nanosheets                      | 51                                    | 20               |
| NiFeP/MXene                                                                   | 1M KOH        | 286@50 mA/cm                      | Etching + Hydrothermal          | 3D laminar structures                                 | 35                                    | 21               |
| Ti <sub>3</sub> C <sub>2</sub> T <sub>x</sub> /TiO <sub>2</sub> /NiFeCo-LDH   | 1M KOH        | 155 @ 10 mA/cm <sup>2</sup>       | Etching + Hydrothermal          | Accordion + spindle like morphology                   | 98.4                                  | 22               |
| NiFe LDH/Ti <sub>3</sub> C <sub>2</sub> T <sub>x</sub> /NF                    | 1M KOH        | 200@10 mA/cm                      | Etching + Hydrothermal          | Hollow petal shape structures                         | 64.2                                  | 23               |
| CoFe-LDH on MXene                                                             | 1M KOH        | 319 @ 10 mA/cm <sup>2</sup>       | Etching + Hydrothermal          | Accordion+ densely packed arrays                      | 50                                    | 24               |
| CoS <sub>2</sub> @MXene                                                       | 1M KOH        | 150@ 10 mA/cm <sup>2</sup>        | Etching + freeze-drying         | NWs anchored on MXene                                 | 92                                    | 25               |
| FeS <sub>2</sub> @MXene                                                       | 1M KOH        | 240@ 10 mA/cm <sup>2</sup>        | Etching + solvothermal reaction | nanoparticles anchored on MXene                       | 58.7                                  | 26               |
| CoNi-ZIF-67@Ti <sub>3</sub> C <sub>2</sub> T <sub>x</sub>                     | 1M KOH        | 275@ 10 mA/cm <sup>2</sup>        | Etching + chemical reaction     | rhombic dodecahedral structure on MXene               | 65.1                                  | 27               |
| MWCNT/V <sub>2</sub> CT <sub>x</sub>                                          | 1M KOH        | 469@ 10 mA/cm <sup>2</sup>        | Etching + sonication            | MWCNTs on accordion-like structure                    | 77                                    | 28               |
| Fe <sub>3</sub> O <sub>4</sub> /Ti <sub>3</sub> C <sub>2</sub> T <sub>x</sub> | 1M KOH        | 290@ 10 mA/cm <sup>2</sup>        | Etching + Hydrothermal          | sparsely and unevenly nanoplates grown on MXene       | 65.1                                  | 29               |
| Co-CoO/Ti <sub>3</sub> C <sub>2</sub> -MXene/NF                               | 1M KOH        | 271@10 mA/cm                      | Etching + vacuum tube furnace   | Co-CoO nanoplates on thin MXene nanosheets            | 47                                    | 30               |
| CoP@MXene                                                                     | 1M KOH        | 146@ 10 mA/cm <sup>2</sup>        | Etching + Hydrothermal          | 1D CoP nanorods on MXene nanosheets                   | 32.5                                  | 31               |

|                                                   |         |                             |                                                     |                            |    |    |
|---------------------------------------------------|---------|-----------------------------|-----------------------------------------------------|----------------------------|----|----|
| NiSe <sub>2</sub> @MoS <sub>2</sub>               | 1 M KOH | 267 @ 10 mA/cm <sup>2</sup> | electrochemical deposition + hydrothermal synthesis | Disorder nanograin         | 85 | 32 |
| Co <sup>3+</sup> -Cr <sub>2</sub> CT <sub>x</sub> | 1M KOH  | 420@ 10 mA/cm <sup>2</sup>  | E-etching method                                    | 3D polydisperse composites | -  | 33 |

## References

1. J. Wang, P. He, Y. Shen, L. Dai, Z. Li, Y. Wu and C. An, FeNi nanoparticles on Mo<sub>2</sub>TiC<sub>2</sub>T<sub>x</sub> MXene@ nickel foam as robust electrocatalysts for overall water splitting, *Nano Research*, 2021, **14**, 3474-3481.
2. J. Ren, H. Zong, Y. Sun, S. Gong, Y. Feng, Z. Wang, L. Hu, K. Yu and Z. Zhu, 2D organ-like molybdenum carbide (MXene) coupled with MoS<sub>2</sub> nanoflowers enhances the catalytic activity in the hydrogen evolution reaction, *CrystEngComm*, 2020, **22**, 1395-1403.
3. J. Liang, C. Ding, J. Liu, T. Chen, W. Peng, Y. Li, F. Zhang and X. Fan, Heterostructure engineering of Co-doped MoS<sub>2</sub> coupled with Mo<sub>2</sub>CT<sub>x</sub> MXene for enhanced hydrogen evolution in alkaline media, *Nanoscale*, 2019, **11**, 10992-11000.
4. B. Shen, H. Huang, Y. Jiang, Y. Xue and H. He, 3D interweaving MXene-graphene network-confined Ni-Fe layered double hydroxide nanosheets for enhanced hydrogen evolution, *Electrochimica Acta*, 2022, 139913.
5. Y. Li, X. Wu, H. Zhang and J. Zhang, Interface Designing over WS<sub>2</sub>/W<sub>2</sub>C for Enhanced Hydrogen Evolution Catalysis, *ACS Applied Energy Materials*, 2018, **1**, 3377-3384.
6. X. Wu, Z. Wang, M. Yu, L. Xiu and J. Qiu, Stabilizing the MXenes by carbon nanoplating for developing hierarchical nanohybrids with efficient lithium storage and hydrogen evolution capability, *Advanced Materials*, 2017, **29**, 1607017.
7. M. A. Tekalgne, H. H. Do, T. V. Nguyen, Q. V. Le, S. H. Hong, S. H. Ahn and S. Y. Kim, MXene Hybrid Nanosheet of WS<sub>2</sub>/Ti<sub>3</sub>C<sub>2</sub> for Electrocatalytic Hydrogen Evolution Reaction, *ACS Omega*, 2023.
8. L. Huang, L. Ai, M. Wang, J. Jiang and S. Wang, Hierarchical MoS<sub>2</sub> nanosheets integrated

- Ti<sub>3</sub>C<sub>2</sub> MXenes for electrocatalytic hydrogen evolution, *International Journal of Hydrogen Energy*, 2019, **44**, 965-976.
9. Y. Liu, B. Huang and Z. Xie, Hydrothermal synthesis of core-shell MoO<sub>2</sub>/α-Mo<sub>2</sub>C heterojunction as high performance electrocatalyst for hydrogen evolution reaction, *Applied Surface Science*, 2018, **427**, 693-701.
  10. H. Zong, R. Qi, K. Yu and Z. Zhu, Ultrathin Ti<sub>2</sub>NT<sub>x</sub> MXene-wrapped MOF-derived CoP frameworks towards hydrogen evolution and water oxidation, *Electrochimica Acta*, 2021, **393**, 139068.
  11. H. Jiang, Z. Wang, Q. Yang, L. Tan, L. Dong and M. Dong, Ultrathin Ti<sub>3</sub>C<sub>2</sub>T<sub>x</sub> (MXene) nanosheet-wrapped NiSe<sub>2</sub> octahedral crystal for enhanced supercapacitor performance and synergetic electrocatalytic water splitting, *Nano-micro letters*, 2019, **11**, 1-14.
  12. K. Zhang, Y. Zhao, S. Zhang, H. Yu, Y. Chen, P. Gao and C. Zhu, MoS<sub>2</sub> nanosheet/Mo<sub>2</sub>C-embedded N-doped carbon nanotubes: synthesis and electrocatalytic hydrogen evolution performance, *Journal of Materials Chemistry A*, 2014, **2**, 18715-18719.
  13. F. Rasool, B. M. Pirzada, S. H. Talib, T. Alkhidir, D. H. Anjum, S. Mohamed and A. Qurashi, In Situ Growth of Interfacially Nanoengineered 2D–2D WS<sub>2</sub>/Ti<sub>3</sub>C<sub>2</sub>T<sub>x</sub> MXene for the Enhanced Performance of Hydrogen Evolution Reactions, *ACS applied materials & interfaces*, 2024, **16**, 14229-14242.
  14. H. Wang, C. Sun, Y. Cao, J. Zhu, Y. Chen, J. Guo, J. Zhao, Y. Sun and G. Zou, Molybdenum carbide nanoparticles embedded in nitrogen-doped porous carbon nanofibers as a dual catalyst for hydrogen evolution and oxygen reduction reactions, *Carbon*, 2017, **114**, 628-634.
  15. L.-N. Zhang, S.-H. Li, H.-Q. Tan, S. U. Khan, Y.-Y. Ma, H.-Y. Zang, Y.-H. Wang and Y.-G. Li, MoP/Mo<sub>2</sub>C@C: a new combination of electrocatalysts for highly efficient hydrogen evolution over the entire pH range, *ACS applied materials & interfaces*, 2017, **9**, 16270-16279.
  16. A. Djire, X. Wang, C. Xiao, O. C. Nwamba, M. V. Mirkin and N. R. Neale, Basal plane hydrogen evolution activity from mixed metal nitride MXenes measured by scanning electrochemical microscopy, *Advanced Functional Materials*, 2020, **30**, 2001136.
  17. Z. Ai, B. Chang, C. Xu, B. Huang, Y. Wu, X. Hao and Y. Shao, Interface engineering in the BNNS@Ti<sub>3</sub>C<sub>2</sub> intercalation structure for enhanced electrocatalytic hydrogen evolution,

- New Journal of Chemistry*, 2019, **43**, 8613-8619.
18. T. Ouyang, A.-N. Chen, Z.-Z. He, Z.-Q. Liu and Y. Tong, Rational design of atomically dispersed nickel active sites in  $\beta$ -Mo<sub>2</sub>C for the hydrogen evolution reaction at all pH values, *Chem. Comm.*, 2018, **54**, 9901-9904.
  19. M. Yu, S. Zhou, Z. Wang, J. Zhao and J. Qiu, Boosting electrocatalytic oxygen evolution by synergistically coupling layered double hydroxide with MXene, *Nano Energy*, 2018, **44**, 181-190.
  20. S. Liu, Z. Lin, R. Wan, Y. Liu, Z. Liu, S. Zhang, X. Zhang, Z. Tang, X. Lu and Y. Tian, Cobalt phosphide supported by two-dimensional molybdenum carbide (MXene) for the hydrogen evolution reaction, oxygen evolution reaction, and overall water splitting, *Journal of Materials Chemistry A*, 2021, **9**, 21259-21269.
  21. J. Chen, Q. Long, K. Xiao, T. Ouyang, N. Li, S. Ye and Z.-Q. Liu, Vertically-interlaced NiFeP/MXene electrocatalyst with tunable electronic structure for high-efficiency oxygen evolution reaction, *Science Bulletin*, 2021, **66**, 1063-1072.
  22. N. Hao, Y. Wei, J. Wang, Z. Wang, Z. Zhu, S. Zhao, M. Han and X. Huang, In situ hybridization of an MXene/TiO<sub>2</sub>/NiFeCo-layered double hydroxide composite for electrochemical and photoelectrochemical oxygen evolution, *RSC advances*, 2018, **8**, 20576-20584.
  23. Z. Li, X. Wang, J. Ren and H. Wang, NiFe LDH/Ti<sub>3</sub>C<sub>2</sub>Tx/nickel foam as a binder-free electrode with enhanced oxygen evolution reaction performance, *International Journal of Hydrogen Energy*, 2022, **47**, 3886-3892.
  24. C. Hao, Y. Wu, Y. An, B. Cui, J. Lin, X. Li, D. Wang, M. Jiang, Z. Cheng and S. Hu, Interface-coupling of CoFe-LDH on MXene as high-performance oxygen evolution catalyst, *Materials Today Energy*, 2019, **12**, 453-462.
  25. S. Han, Y. Chen, Y. Hao, Y. Xie, D. Xie, Y. Chen, Y. Xiong, Z. He, F. Hu and L. Li, Multi-dimensional hierarchical CoS<sub>2</sub>@ MXene as trifunctional electrocatalysts for zinc-air batteries and overall water splitting, *Science China Materials*, 2021, **64**, 1127-1138.
  26. S. Peng, Y. Xie, H. Yu, L. Deng, D. Yu, L. Li, R. Amin, A. E. Fetohi, M. Y. Maximov and K. El-Khatib, Anchoring stable FeS<sub>2</sub> nanoparticles on MXene nanosheets via interface engineering for efficient water splitting, *Inorganic Chemistry Frontiers*, 2022.
  27. Y. Wen, Z. Wei, C. Ma, X. Xing, Z. Li and D. Luo, MXene boosted CoNi-ZIF-67 as highly

- efficient electrocatalysts for oxygen evolution, *Nanomaterials*, 2019, **9**, 775.
28. S. A. Zahra and S. Rizwan, MWCNT-modified MXene as cost-effective efficient bifunctional catalyst for overall water splitting, *RSC advances*, 2022, **12**, 8405-8413.
  29. L. Zhang, Z. Wang, W. Chen, R. Yuan, K. Zhan, M. Zhu, J. Yang and B. Zhao, Fe<sub>3</sub>O<sub>4</sub> nanoplates anchored on Ti<sub>3</sub>C<sub>2</sub>T<sub>x</sub> MXene with enhanced pseudocapacitive and electrocatalytic properties, *Nanoscale*, 2021, **13**, 15343-15351.
  30. D. Guo, X. Li, Y. Jiao, H. Yan, A. Wu, G. Yang, Y. Wang, C. Tian and H. Fu, A dual-active Co-CoO heterojunction coupled with Ti<sub>3</sub>C<sub>2</sub>-MXene for highly-performance overall water splitting, *Nano Research*, 2022, **15**, 238-247.
  31. N. C. S. Selvam, J. Lee, G. H. Choi, M. J. Oh, S. Xu, B. Lim and P. J. Yoo, MXene supported Co<sub>x</sub>A<sub>y</sub> (A= OH, P, Se) electrocatalysts for overall water splitting: unveiling the role of anions in intrinsic activity and stability, *Journal of Materials Chemistry A*, 2019, **7**, 27383-27393.
  32. Y. Huang, J. Huang, K. Xu and R. Geng, Constructing NiSe<sub>2</sub>@ MoS<sub>2</sub> nano-heterostructures on a carbon fiber paper for electrocatalytic oxygen evolution, *RSC advances*, 2021, **11**, 26928-26936.
  33. S.-Y. Pang, Y.-T. Wong, S. Yuan, Y. Liu, M.-K. Tsang, Z. Yang, H. Huang, W.-T. Wong and J. Hao, Universal strategy for HF-free facile and rapid synthesis of two-dimensional MXenes as multifunctional energy materials, *Journal of the American Chemical Society*, 2019, **141**, 9610-9616.
